# Supplementary material for: Ampicillin-susceptible Enterococcus faecium infections: clinical features, causal clades, and contribution of MALDI-TOF to early detection
Source: PubMed Central journal article supplement (PMC10581188; doi:10.1128/spectrum.04545-22), 2023-09-25
Supplement: spectrum.04545-22-s0004.pdf [file spectrum.04545-22-s0004.pdf]

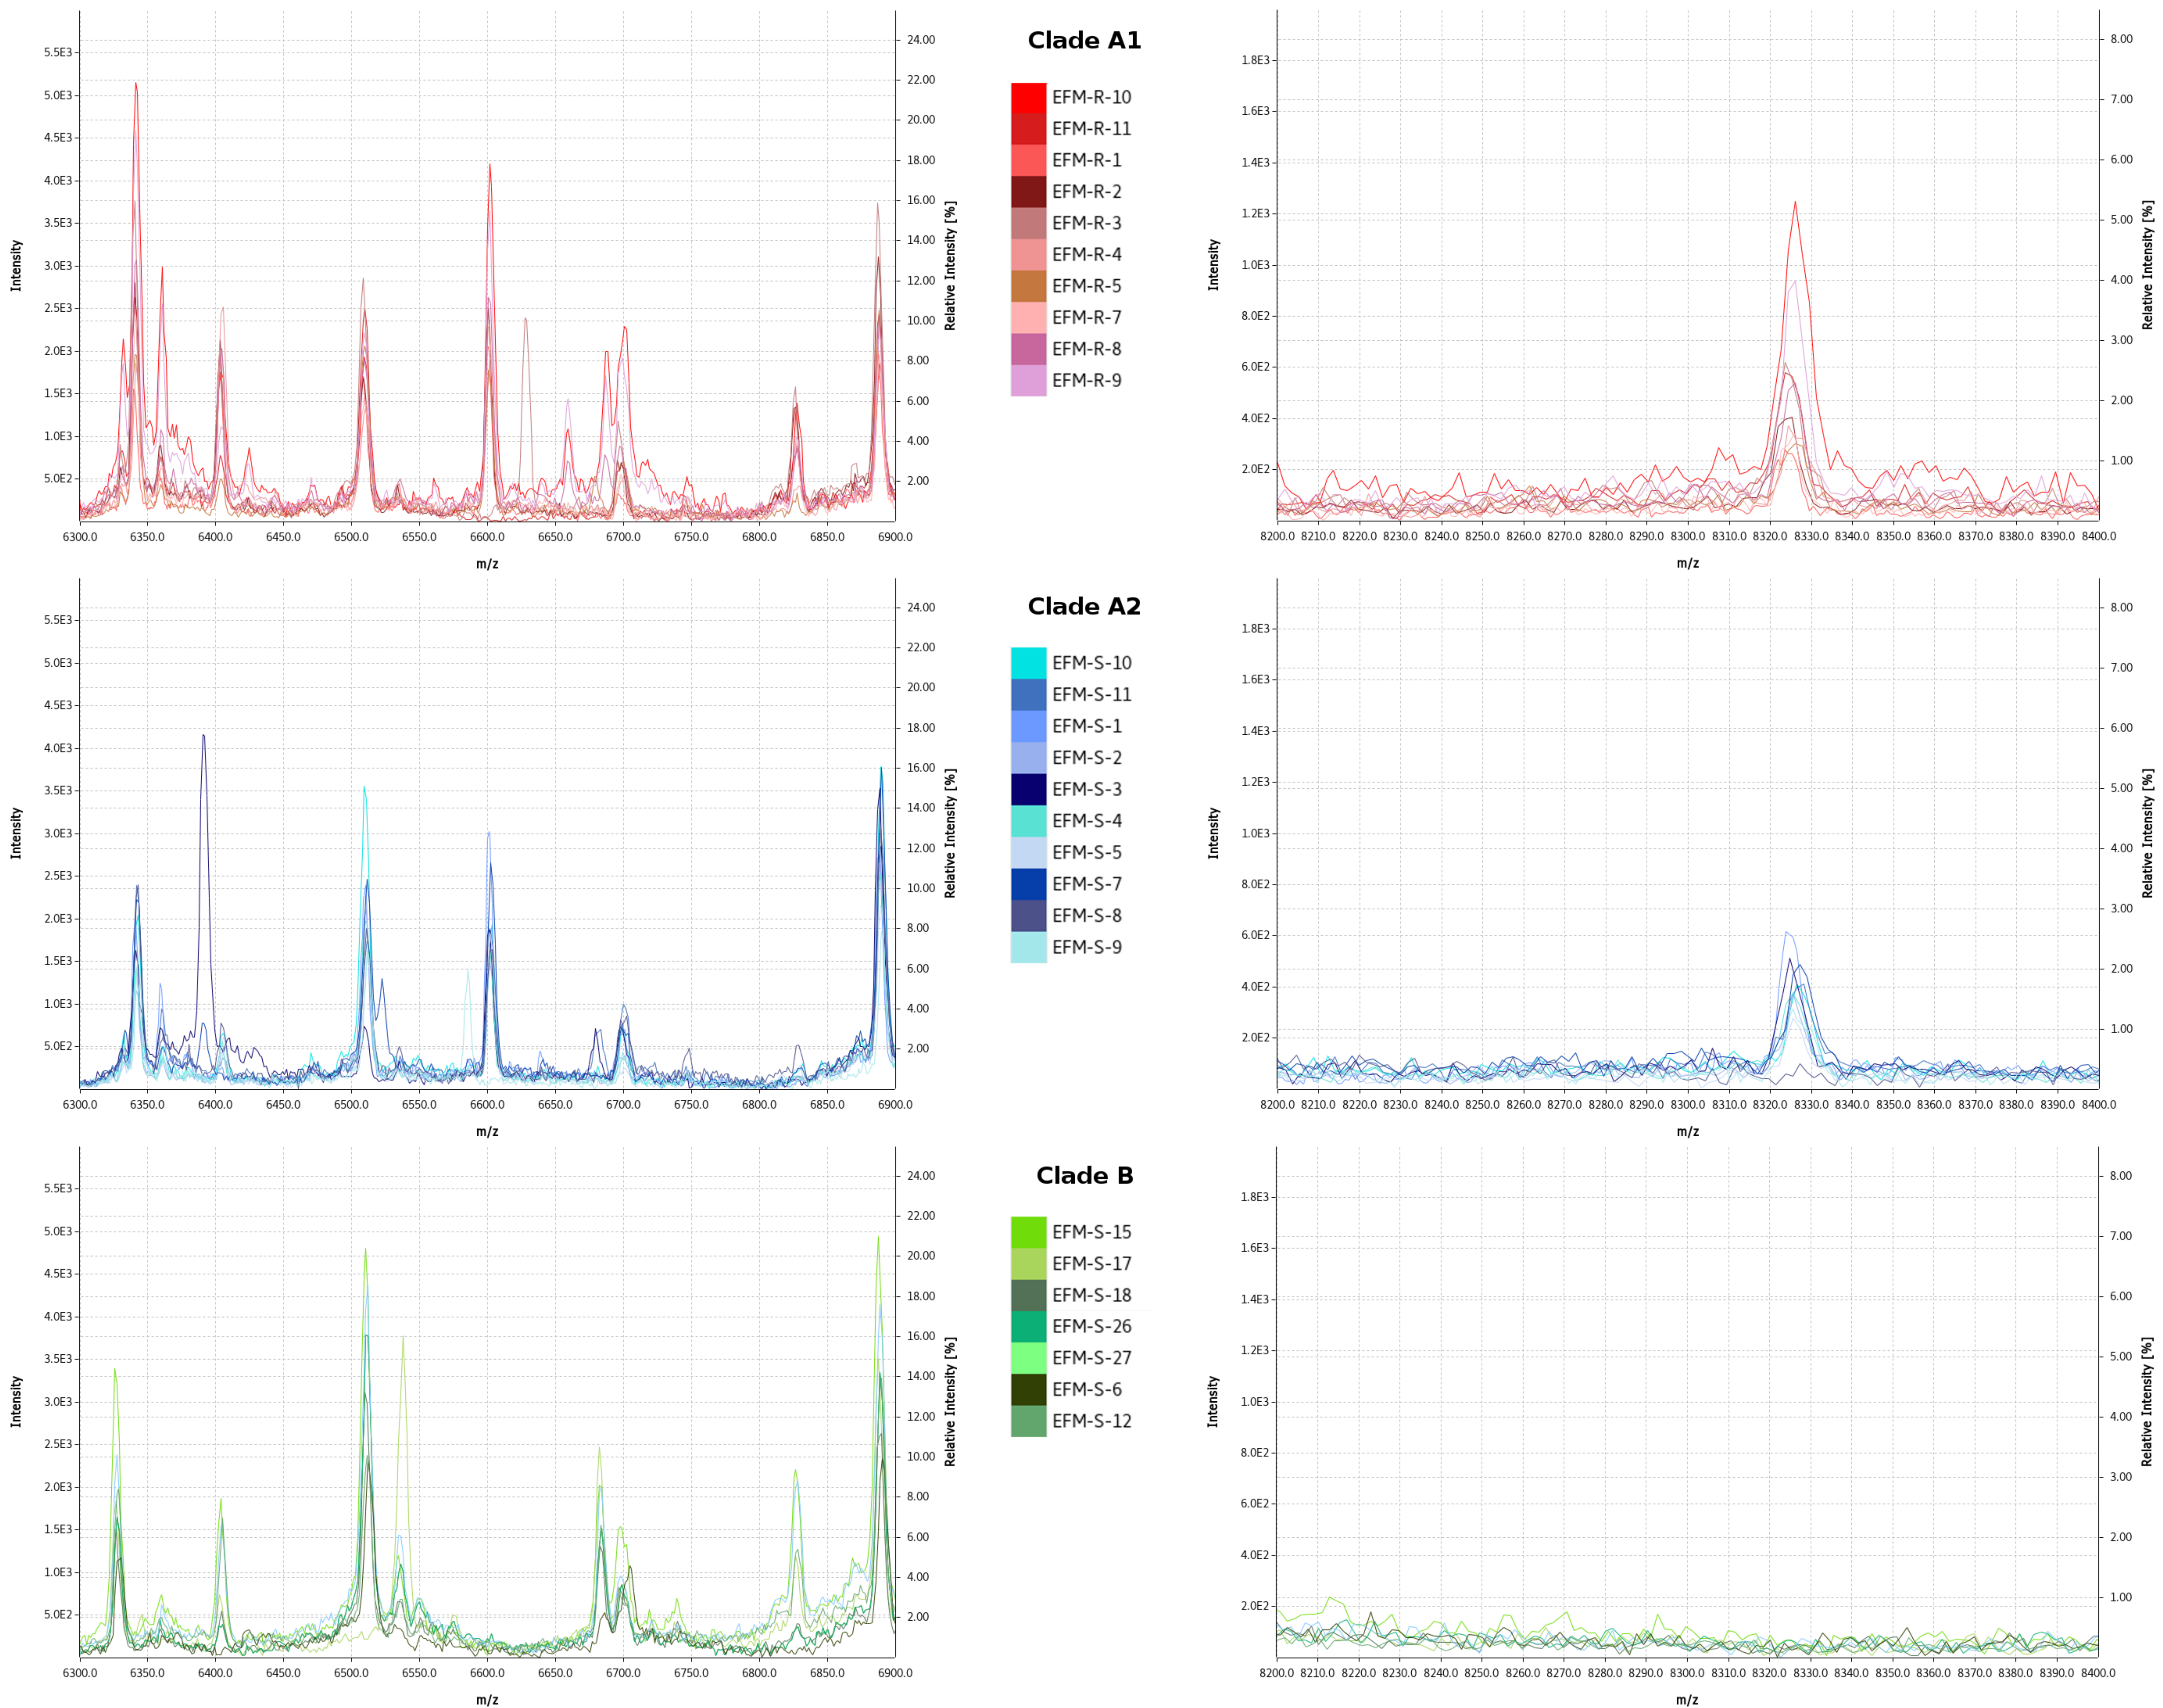

**Figure S4.** Example of mass spectra ranges obtained from the 27 isolates used to build the MALDI-TOF MS database. A) m/z ranges from 6300 to 6900. B) m/z ranges from 8200 to 8400. Isolates from the A1 clade are shown in red, those from the A2 clade in blue and those from the B clade in green. Spectra were read with the open source software OpenChrom v1.5.0 (<http://www.openchrom.net/>).
